# Supplementary material for: Photoswitchable spiropyran molecules for specific sensing of thiols and fluorescent inks
Source: Royal Society of Chemistry journal article supplement (doi:10.1039/d3nj03188h), 2023-01-01
Supplement: d3nj03188h1.pdf [file d3nj03188h1.pdf]

# Photoswitchable Spiropyran Molecular for Specific Sensing of Thiols and Fluorescent Ink

Tiantian Xu,<sup>a</sup> Xu Zhang,<sup>a</sup> Qian Wang,<sup>a</sup> Shaobing Zhang,<sup>a</sup> Chengkun Wang,<sup>a</sup> Hui Li,<sup>a</sup> Zheng Yang,<sup>ab</sup> Xiaodan Jia,<sup>ab</sup> Xiangrong Liu,<sup>ab</sup>

<sup>a</sup> College of Chemistry and Chemical Engineering, Xi'an University of Science and Technology, Xi'an 710054, P. R. China;

<sup>b</sup> Key Laboratory of Coal Resources Exploration and Comprehensive Utilization, Ministry of Land and Resources, Xi'an 710012, P. R. China;

\*Corresponding author: yangzheng@xust.edu.cn; orcid.org/0000-0002-1554-4794.

## CONTENTS

|                                           |            |
|-------------------------------------------|------------|
| <b>1. The optical properties of probe</b> | <b>S2</b>  |
| <b>2. Calculation of the LODs</b>         | <b>S12</b> |
| <b>3. IR, NMR and MS spectra</b>          | <b>S17</b> |
| <b>4. MTT assay results of the probe</b>  | <b>S23</b> |

## 1. Optical properties of the probe.

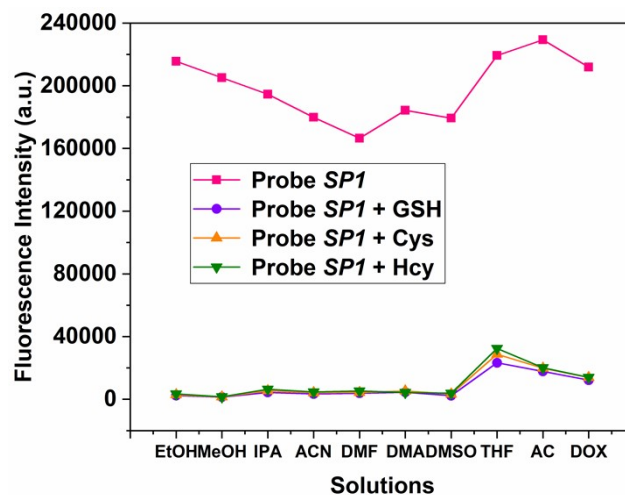

**Fig. S1** Fluorescence intensity of probe *SP1* ( $20 \mu\text{mol}\cdot\text{L}^{-1}$ ) in presence of 2.5 equiv. of thiols in different solutions with PBS buffer ( $0.2 \text{ mol}\cdot\text{L}^{-1}$ , pH 7.4),  $\lambda_{\text{ex}} = 370 \text{ nm}$ .

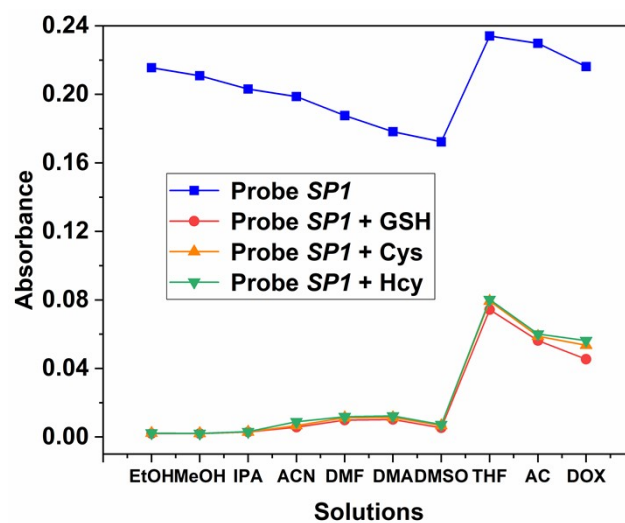

**Fig. S2** Absorbance of probe *SP1* ( $20 \mu\text{mol}\cdot\text{L}^{-1}$ ) in presence of 2.5 equiv. of thiols in different solutions with PBS buffer ( $0.2 \text{ mol}\cdot\text{L}^{-1}$ , pH 7.4).

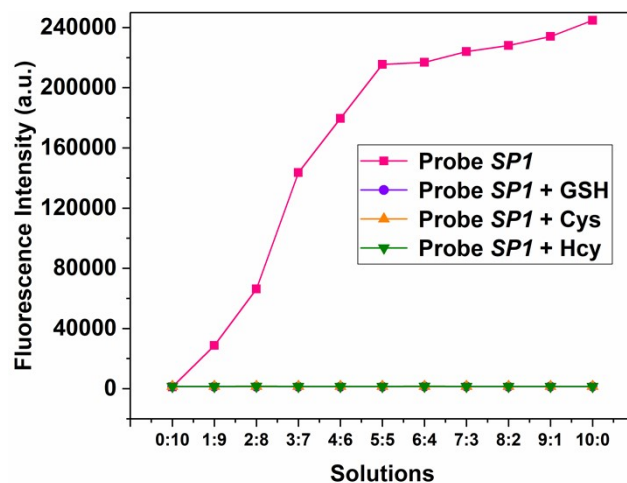

**Fig. S3** Fluorescence intensity of probe *SP1* ( $20 \mu\text{mol}\cdot\text{L}^{-1}$ ) in presence of 2.5 equiv. of thiols in different EtOH-H<sub>2</sub>O solutions with PBS buffer ( $0.2 \text{ mol}\cdot\text{L}^{-1}$ , pH 7.4),  $\lambda_{\text{ex}} = 370 \text{ nm}$ .

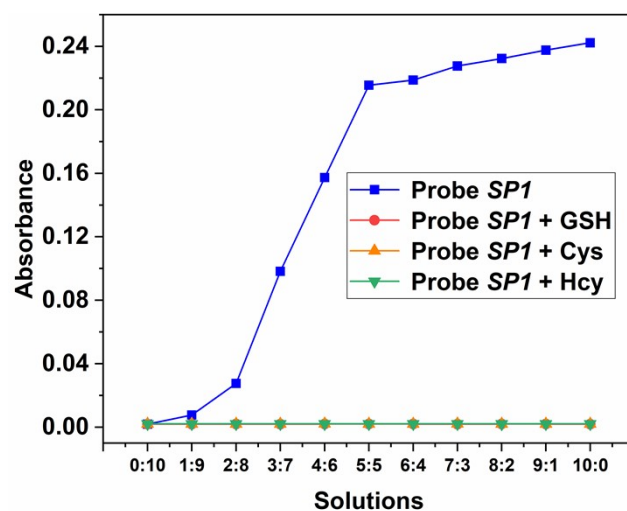

**Fig. S4** Absorbance of probe *SP1* ( $20 \mu\text{mol}\cdot\text{L}^{-1}$ ) in presence of 2.5 equiv. of thiols in different EtOH-H<sub>2</sub>O solutions with PBS buffer ( $0.2 \text{ mol}\cdot\text{L}^{-1}$ , pH 7.4).

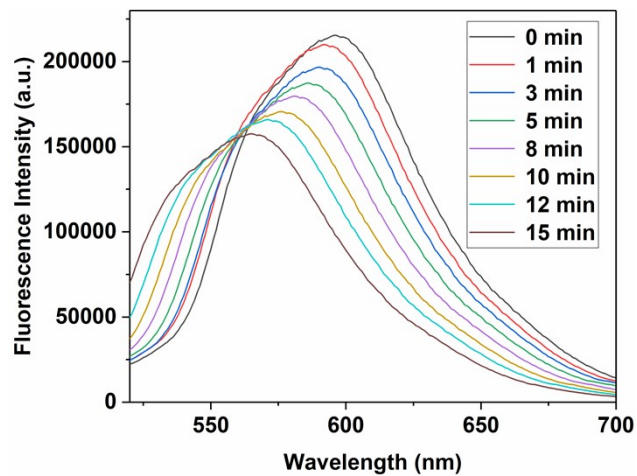

**Fig. S5** Fluorescence spectra of the probe *SPI* under continuous heating at 80 °C in EtOH-H<sub>2</sub>O (5:5, v/v, PBS, pH 7.4) solution,  $\lambda_{\text{ex}} = 370$  nm.

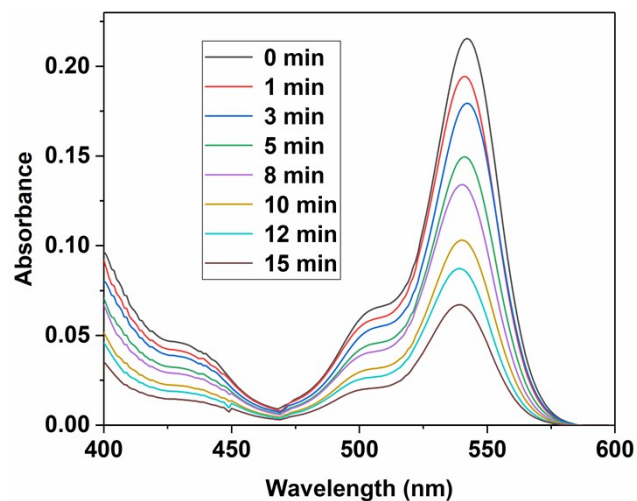

**Fig. S6** Absorption spectra of the probe *SPI* under continuous heating at 80 °C in EtOH-H<sub>2</sub>O (5:5, v/v, PBS, pH 7.4) solution.

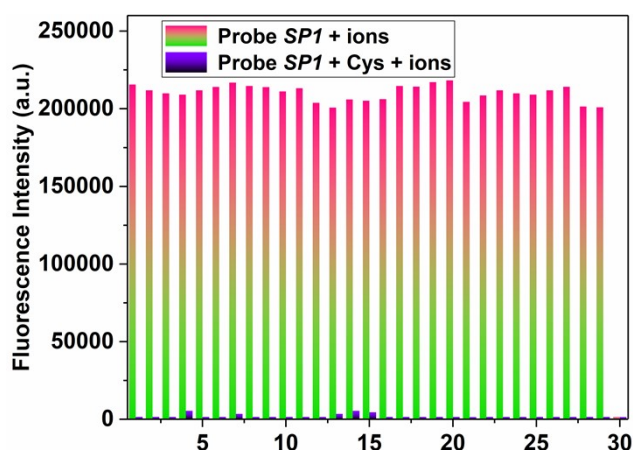

**Fig. S7** Fluorescence intensity changes of probe *SPI* ( $20 \mu\text{mol}\cdot\text{L}^{-1}$ ) in EtOH-H<sub>2</sub>O (5:5, v/v, PBS, pH 7.4) over the analytes of interest. Pink-green bars represent the fluorescence response of probe *SPI* to: 1, blank; 2, Na<sup>+</sup>; 3, K<sup>+</sup>; 4, Ag<sup>+</sup>; 5, Ca<sup>2+</sup>; 6, Mg<sup>2+</sup>; 7, Cu<sup>2+</sup>; 8, Cd<sup>2+</sup>; 9, Mn<sup>2+</sup>; 10, Co<sup>2+</sup>; 11, Ni<sup>2+</sup>; 12, Zn<sup>2+</sup>; 13, Pb<sup>2+</sup>; 14, Hg<sup>2+</sup>; 15, Fe<sup>3+</sup>; 16, Cr<sup>3+</sup>; 17, Al<sup>3+</sup>; 18, O<sub>2</sub><sup>·-</sup>; 19, H<sub>2</sub>O<sub>2</sub>; 20, NO; 21, H<sub>2</sub>S; 22, ONOO<sup>-</sup>; 23, NO<sub>3</sub><sup>-</sup>; 24, PO<sub>4</sub><sup>3-</sup>; 25, CO<sub>3</sub><sup>2-</sup>; 26, OAc<sup>-</sup>; 27, C<sub>2</sub>O<sub>4</sub><sup>2-</sup>; 28, SO<sub>3</sub><sup>2-</sup>; 29, HClO; 30, Cys. Blue-black bars represent the fluorescence response with subsequent addition of 2.5 equiv. of Cys to the above solutions,  $\lambda_{\text{ex}} = 370 \text{ nm}$ .

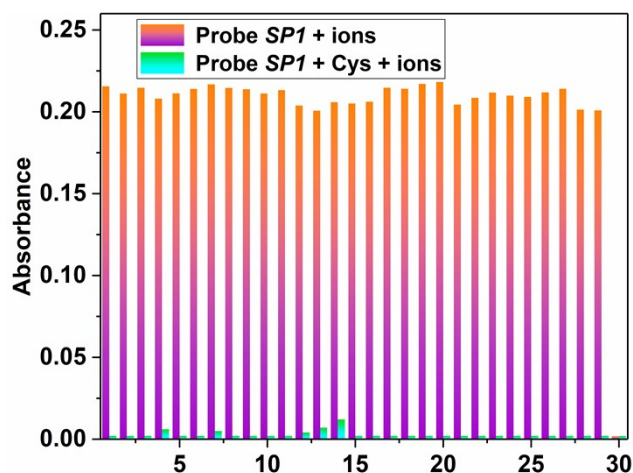

**Fig. S8** Absorbance changes of probe *SPI* ( $20 \mu\text{mol}\cdot\text{L}^{-1}$ ) in EtOH-H<sub>2</sub>O (5:5, v/v, PBS, pH 7.4) over the analytes of interest. Orange-purple bars represent the fluorescence response of probe *SPI* to: 1, blank; 2, Na<sup>+</sup>; 3, K<sup>+</sup>; 4, Ag<sup>+</sup>; 5, Ca<sup>2+</sup>; 6, Mg<sup>2+</sup>; 7, Cu<sup>2+</sup>; 8, Cd<sup>2+</sup>; 9, Mn<sup>2+</sup>; 10, Co<sup>2+</sup>; 11, Ni<sup>2+</sup>; 12, Zn<sup>2+</sup>; 13, Pb<sup>2+</sup>; 14, Hg<sup>2+</sup>; 15, Fe<sup>3+</sup>; 16, Cr<sup>3+</sup>; 17, Al<sup>3+</sup>; 18, O<sub>2</sub><sup>·-</sup>; 19, H<sub>2</sub>O<sub>2</sub>; 20, NO; 21, H<sub>2</sub>S; 22, ONOO<sup>-</sup>; 23, NO<sub>3</sub><sup>-</sup>; 24, PO<sub>4</sub><sup>3-</sup>; 25, CO<sub>3</sub><sup>2-</sup>; 26, OAc<sup>-</sup>; 27, C<sub>2</sub>O<sub>4</sub><sup>2-</sup>; 28, SO<sub>3</sub><sup>2-</sup>; 29, HClO; 30, Cys. Green-cyan bars represent the fluorescence response with subsequent addition of 2.5 equiv. of Cys to the above

solutions.

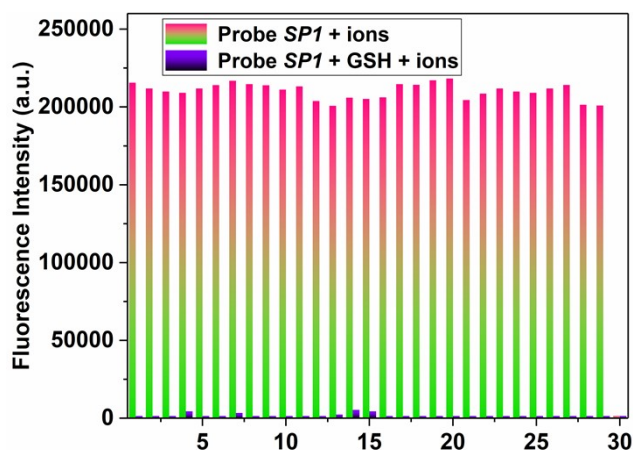

**Fig. S9** Fluorescence intensity changes of probe *SPI* ( $20 \mu\text{mol}\cdot\text{L}^{-1}$ ) in EtOH-H<sub>2</sub>O (5:5, v/v, PBS, pH 7.4) over the analytes of interest. Pink-green bars represent the fluorescence response of probe *SPI* to: 1, blank; 2, Na<sup>+</sup>; 3, K<sup>+</sup>; 4, Ag<sup>+</sup>; 5, Ca<sup>2+</sup>; 6, Mg<sup>2+</sup>; 7, Cu<sup>2+</sup>; 8, Cd<sup>2+</sup>; 9, Mn<sup>2+</sup>; 10, Co<sup>2+</sup>; 11, Ni<sup>2+</sup>; 12, Zn<sup>2+</sup>; 13, Pb<sup>2+</sup>; 14, Hg<sup>2+</sup>; 15, Fe<sup>3+</sup>; 16, Cr<sup>3+</sup>; 17, Al<sup>3+</sup>; 18, O<sub>2</sub><sup>-</sup>; 19, H<sub>2</sub>O<sub>2</sub>; 20, NO; 21, H<sub>2</sub>S; 22, ONOO<sup>-</sup>; 23, NO<sub>3</sub><sup>-</sup>; 24, PO<sub>4</sub><sup>3-</sup>; 25, CO<sub>3</sub><sup>2-</sup>; 26, OAc<sup>-</sup>; 27, C<sub>2</sub>O<sub>4</sub><sup>2-</sup>; 28, SO<sub>3</sub><sup>2-</sup>; 29, HClO; 30, GSH. Blue-black bars represent the fluorescence response with subsequent addition of 2.5 equiv. of GSH to the above solutions,  $\lambda_{\text{ex}} = 370 \text{ nm}$ .

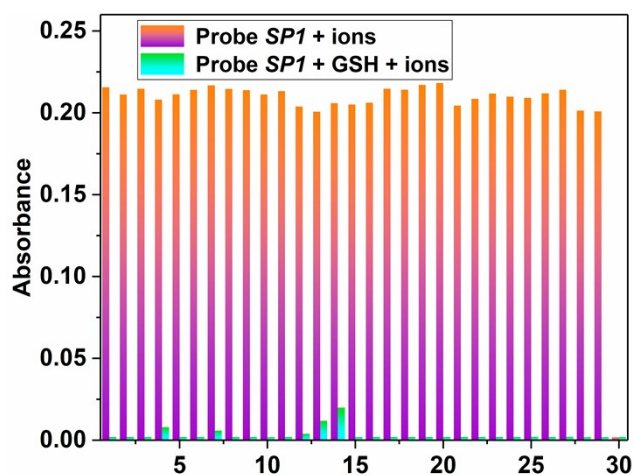

**Fig. S10** Absorbance changes of probe *SPI* ( $20 \mu\text{mol}\cdot\text{L}^{-1}$ ) in EtOH-H<sub>2</sub>O (5:5, v/v, PBS, pH 7.4) over the analytes of interest. Orange-purple bars represent the fluorescence response of probe *SPI* to: 1, blank; 2, Na<sup>+</sup>; 3, K<sup>+</sup>; 4, Ag<sup>+</sup>; 5, Ca<sup>2+</sup>; 6, Mg<sup>2+</sup>; 7, Cu<sup>2+</sup>; 8, Cd<sup>2+</sup>; 9, Mn<sup>2+</sup>; 10, Co<sup>2+</sup>; 11, Ni<sup>2+</sup>; 12, Zn<sup>2+</sup>; 13, Pb<sup>2+</sup>; 14, Hg<sup>2+</sup>; 15, Fe<sup>3+</sup>; 16, Cr<sup>3+</sup>; 17, Al<sup>3+</sup>; 18, O<sub>2</sub><sup>-</sup>; 19, H<sub>2</sub>O<sub>2</sub>; 20, NO; 21, H<sub>2</sub>S; 22, ONOO<sup>-</sup>; 23, NO<sub>3</sub><sup>-</sup>; 24, PO<sub>4</sub><sup>3-</sup>; 25, CO<sub>3</sub><sup>2-</sup>; 26, OAc<sup>-</sup>; 27, C<sub>2</sub>O<sub>4</sub><sup>2-</sup>; 28, SO<sub>3</sub><sup>2-</sup>; 29, HClO; 30, GSH. Green-cyan bars represent the fluorescence response with subsequent addition of 2.5 equiv.

of GSH to the above solutions.

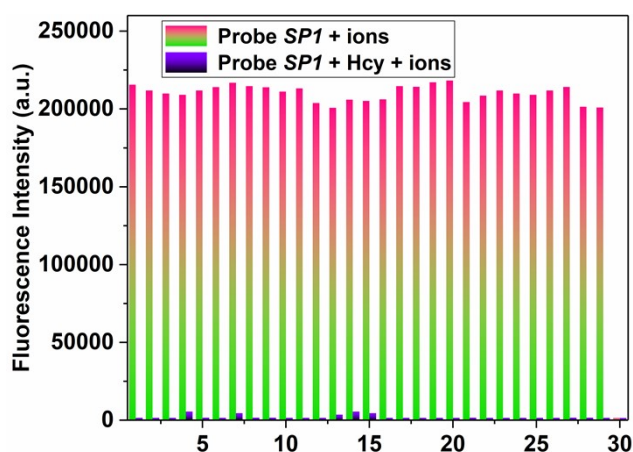

**Fig. S11** Fluorescence intensity changes of probe *SPI* ( $20 \mu\text{mol}\cdot\text{L}^{-1}$ ) in EtOH-H<sub>2</sub>O (5:5, v/v, PBS, pH 7.4) over the analytes of interest. Pink-green bars represent the fluorescence response of probe *SPI* to: 1, blank; 2, Na<sup>+</sup>; 3, K<sup>+</sup>; 4, Ag<sup>+</sup>; 5, Ca<sup>2+</sup>; 6, Mg<sup>2+</sup>; 7, Cu<sup>2+</sup>; 8, Cd<sup>2+</sup>; 9, Mn<sup>2+</sup>; 10, Co<sup>2+</sup>; 11, Ni<sup>2+</sup>; 12, Zn<sup>2+</sup>; 13, Pb<sup>2+</sup>; 14, Hg<sup>2+</sup>; 15, Fe<sup>3+</sup>; 16, Cr<sup>3+</sup>; 17, Al<sup>3+</sup>; 18, O<sub>2</sub><sup>·-</sup>; 19, H<sub>2</sub>O<sub>2</sub>; 20, NO; 21, H<sub>2</sub>S; 22, ONOO<sup>-</sup>; 23, NO<sub>3</sub><sup>-</sup>; 24, PO<sub>4</sub><sup>3-</sup>; 25, CO<sub>3</sub><sup>2-</sup>; 26, OAc<sup>-</sup>; 27, C<sub>2</sub>O<sub>4</sub><sup>2-</sup>; 28, SO<sub>3</sub><sup>2-</sup>; 29, HClO; 30, Hcy. Blue-black bars represent the fluorescence response with subsequent addition of 2.5 equiv. of Hcy to the above solutions,  $\lambda_{\text{ex}} = 370 \text{ nm}$ .

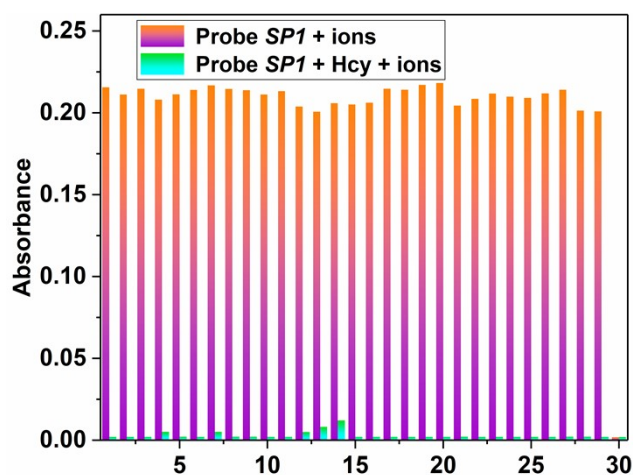

**Fig. S12** Absorbance changes of probe *SPI* ( $20 \mu\text{mol}\cdot\text{L}^{-1}$ ) in EtOH-H<sub>2</sub>O (5:5, v/v, PBS, pH 7.4) over the analytes of interest. Orange-purple bars represent the fluorescence response of probe *SPI* to: 1, blank; 2, Na<sup>+</sup>; 3, K<sup>+</sup>; 4, Ag<sup>+</sup>; 5, Ca<sup>2+</sup>; 6, Mg<sup>2+</sup>; 7, Cu<sup>2+</sup>; 8, Cd<sup>2+</sup>; 9, Mn<sup>2+</sup>; 10, Co<sup>2+</sup>; 11, Ni<sup>2+</sup>; 12, Zn<sup>2+</sup>; 13, Pb<sup>2+</sup>; 14, Hg<sup>2+</sup>; 15, Fe<sup>3+</sup>; 16, Cr<sup>3+</sup>; 17, Al<sup>3+</sup>; 18, O<sub>2</sub><sup>·-</sup>; 19, H<sub>2</sub>O<sub>2</sub>; 20, NO; 21, H<sub>2</sub>S; 22, ONOO<sup>-</sup>; 23, NO<sub>3</sub><sup>-</sup>; 24, PO<sub>4</sub><sup>3-</sup>; 25, CO<sub>3</sub><sup>2-</sup>; 26, OAc<sup>-</sup>; 27, C<sub>2</sub>O<sub>4</sub><sup>2-</sup>; 28, SO<sub>3</sub><sup>2-</sup>; 29, HClO; 30, Hcy. Green-cyan bars represent the fluorescence response with subsequent addition of 2.5 equiv. of

Hcy to the above solutions.

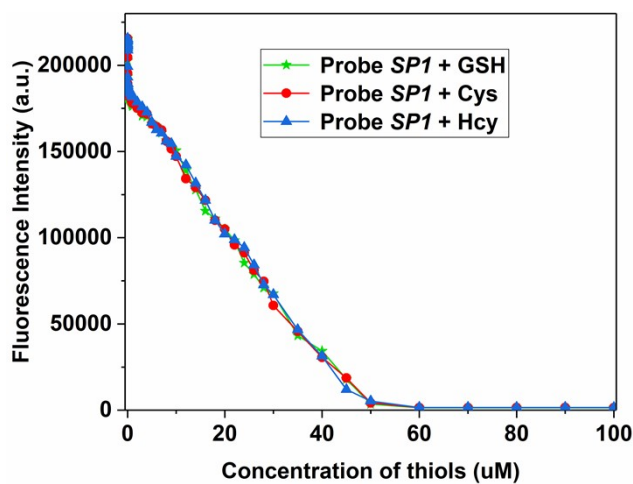

**Fig. S13** Fluorescence intensity change of probe *SPI* ( $20 \mu\text{mol}\cdot\text{L}^{-1}$ ) in EtOH-H<sub>2</sub>O (5:5, v/v, PBS, pH 7.4) solution as a function of thiols concentration at 596 nm,  $\lambda_{\text{ex}} = 370$  nm.

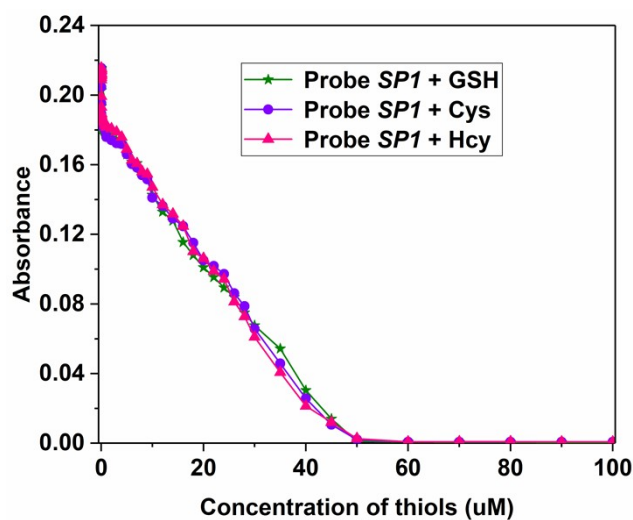

**Fig. S14** Absorption intensity change of probe *SPI* ( $20 \mu\text{mol}\cdot\text{L}^{-1}$ ) in EtOH-H<sub>2</sub>O (5:5, v/v, PBS, pH 7.4) solution as a function of thiols concentration at 542 nm.



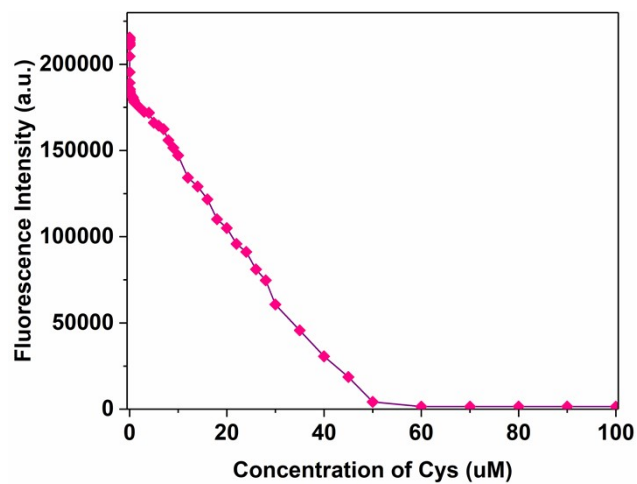

**Fig. S15** Fluorescence intensity change of probe *SPI* ( $20 \mu\text{mol}\cdot\text{L}^{-1}$ ) in EtOH-H<sub>2</sub>O (5:5, v/v, PBS, pH 7.4) solution as a function of Cys concentration at 596 nm,  $\lambda_{\text{ex}} = 370 \text{ nm}$ .

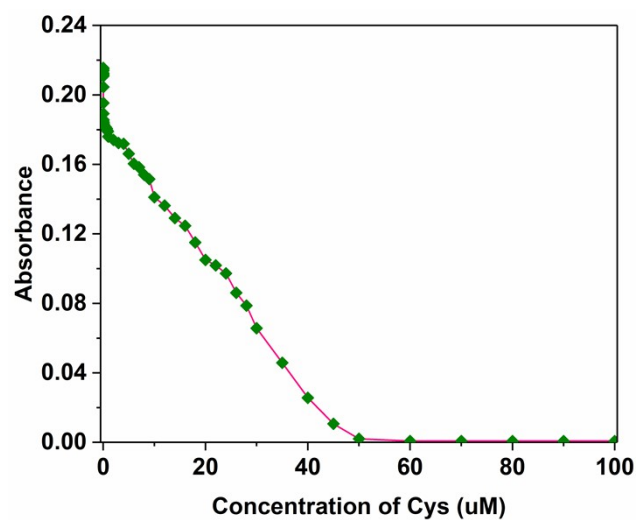

**Fig. S16** Absorption intensity change of probe *SPI* ( $20 \mu\text{mol}\cdot\text{L}^{-1}$ ) in EtOH-H<sub>2</sub>O (5:5, v/v, PBS, pH 7.4) solution as a function of Cys concentration at 542 nm.

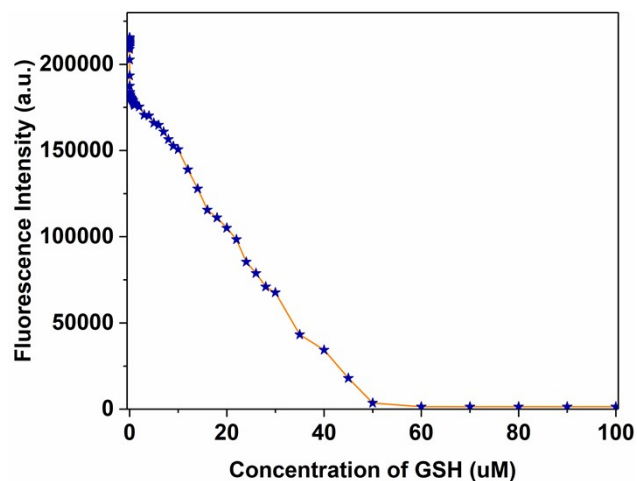

**Fig. S17** Fluorescence intensity change of probe *SPI* ( $20 \mu\text{mol}\cdot\text{L}^{-1}$ ) in EtOH-H<sub>2</sub>O (5:5, v/v, PBS, pH 7.4) solution as a function of GSH concentration at 596 nm,  $\lambda_{\text{ex}} = 370$  nm.

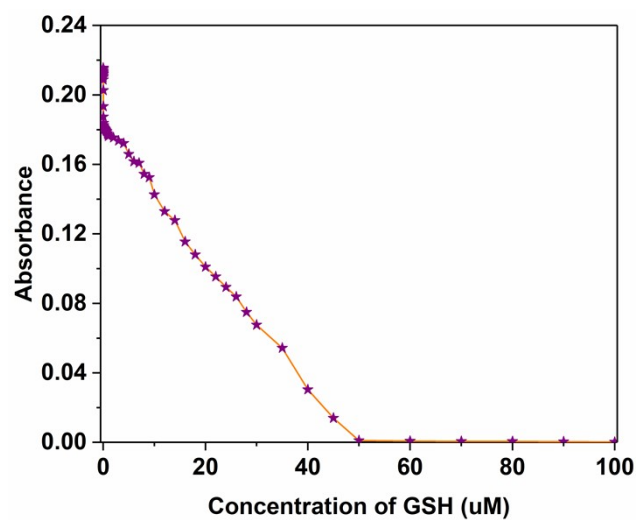

**Fig. S18** Absorption intensity change of probe *SPI* ( $20 \mu\text{mol}\cdot\text{L}^{-1}$ ) in EtOH-H<sub>2</sub>O (5:5, v/v, PBS, pH 7.4) solution as a function of GSH concentration at 542 nm.

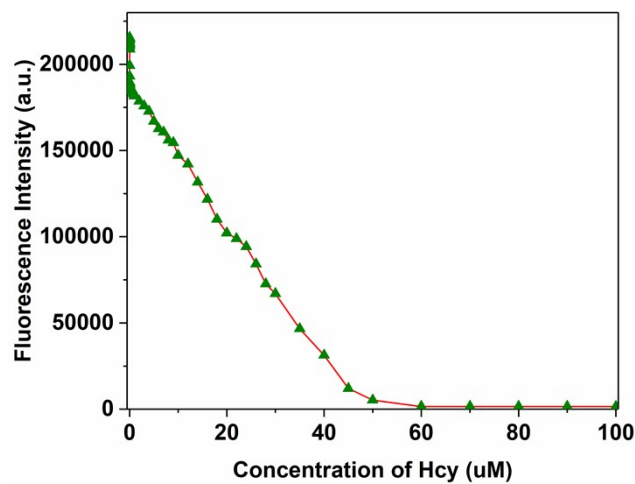

**Fig. S19** Fluorescence intensity change of probe *SPI* ( $20 \mu\text{mol}\cdot\text{L}^{-1}$ ) in EtOH-H<sub>2</sub>O (5:5, v/v, PBS, pH 7.4) solution as a function of Hcy concentration at 596 nm,  $\lambda_{\text{ex}} = 370$  nm.

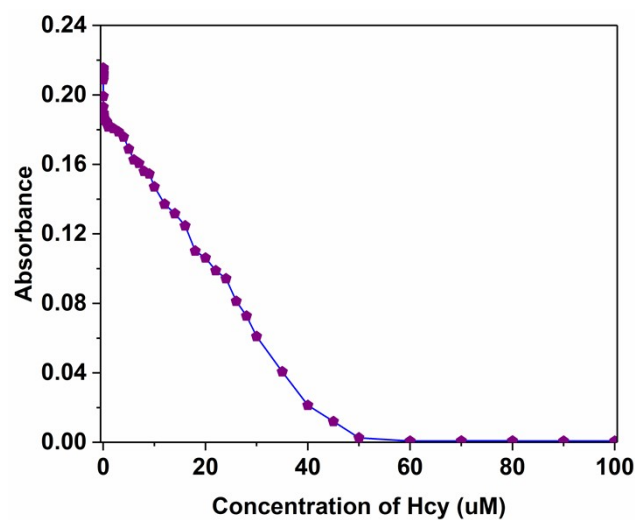

**Fig. S20** Absorption intensity change of probe *SPI* ( $20 \mu\text{mol}\cdot\text{L}^{-1}$ ) in EtOH-H<sub>2</sub>O (5:5, v/v, PBS, pH 7.4) solution as a function of Hcy concentration at 542 nm.

## 2. Calculation of the LODs.

The detection limits were estimated based on the Kaiser's definition:

$$y_d = y_b - KS_b \text{ (on-off)}$$

$y_d$  is the detection limit of the sample.  $y_b$  present the mean value fluorescence intensity of the blank samples.  $S_b$  is the population standard deviation of the blank. The K value is 3 (M. Belter, A. Sajnog, D. Baralkiewicz, *Tlanta*, 2014, **129**, 606.).

**Table S1.** Fluorescence intensity and the Standard deviation of the blank samples

|           | Fl. Intensity | Mean value | Standard deviation | $y_d = y_b - KS_b$ |
|-----------|---------------|------------|--------------------|--------------------|
| Blank #1  | 215570        |            |                    |                    |
| Blank #2  | 214022        |            |                    |                    |
| Blank #3  | 216852        |            |                    |                    |
| Blank #4  | 214642        |            |                    |                    |
| Blank #5  | 213894        |            |                    |                    |
| Blank #6  | 214683        | 214900     | 1218               | 211247             |
| Blank #7  | 214190        |            |                    |                    |
| Blank #8  | 217148        |            |                    |                    |
| Blank #9  | 213915        |            |                    |                    |
| Blank #10 | 214087        |            |                    |                    |

[a]  $y_d$  is the detection limit of the sample.  $y_b$  present the mean value fluorescence intensity of the blank samples.  $S_b$  is the population standard deviation of the blank. The K value is 3.

**Table S2.** Fluorescence intensity and corresponding concentration of thiols

| [Thiols] ( $\mu\text{mol}\cdot\text{L}^{-1}$ ) <sup>1)</sup> | FL. Intensity (Cys) | FL. Intensity (GSH) | FL. Intensity (HCy) |
|--------------------------------------------------------------|---------------------|---------------------|---------------------|
| 0.001                                                        | 215570              | 215570              | 215570              |
| 0.002                                                        | 215362              | 215112              | 215362              |
| 0.003                                                        | 215051              | 215001              | 215051              |
| 0.004                                                        | 214412              | 214912              | 214412              |
| 0.005                                                        | 213947              | 213947              | 213947              |
| 0.006                                                        | 212637              | 213137              | 212637              |
| 0.007                                                        | 212312              | 212312              | 212312              |
| 0.008                                                        | 211861              | 211861              | 211861              |
| 0.009                                                        | 211436              | 210936              | 211436              |
| 0.01                                                         | 211062              | 210062              | 211062              |
| 0.02                                                         | 210825              | 208738              | 210041              |
| 0.03                                                         | 204643              | 202616              | 208735              |
| 0.04                                                         | 195368              | 193434              | 199276              |
| 0.05                                                         | 189281              | 187407              | 193066              |
| 0.06                                                         | 185670              | 183832              | 189383              |
| 0.07                                                         | 185508              | 183671              | 189218              |
| 0.08                                                         | 184396              | 182571              | 188084              |
| 0.09                                                         | 183602              | 181784              | 187274              |
| 0.1                                                          | 183105              | 181292              | 186767              |

**Table S3.** Comparison of *SPI* for information encryption with other reported methods.

| Material                                         | Advantage                                                                                                                           | Ref.         |
|--------------------------------------------------|-------------------------------------------------------------------------------------------------------------------------------------|--------------|
| Organic molecular<br>(pyrene derivatives)        | Orthogonal and temporal encryption properties                                                                                       | 11           |
| Organic molecular<br>(Purine derivatives)        | High fluorescence quantum yield, brightness,<br>optical stability                                                                   | 12           |
| Organic molecular<br>(cyanostilbene derivatives) | Photostability, simple preparation process and<br>processability                                                                    | 13           |
| Tetraphenylethylene@graphen<br>e oxide           | Switchable microstructure and fluorescence                                                                                          | 14           |
| perylene diimide-based<br>metallacages           | High quantum yield, white-light emission                                                                                            | 15           |
| Upconversion nanoparticles                       | Excellent dispersibility and good stability                                                                                         | 16           |
| Fluorescent polymeric<br>nanoparticles           | With tunable FRET efficiency, good<br>photoreversibility, excellent fluorescence stability                                          | 17           |
| Fluorescent Polymers                             | Color-tunable properties and dual-mode<br>luminescence                                                                              | 18           |
| AIE-CDs                                          | Aggregation fluorescence and acid-sensitive                                                                                         | 19           |
| F, NCDs@SiO <sub>2</sub>                         | Thermally activated delayed fluorescence                                                                                            | 20           |
| Organic molecular<br>(spiropyran)                | Photoswitching performance, high fluorescence<br>quantum yield, optical stability, stimuli-responsive<br>and color-tunable property | This<br>work |

**Table S4.** Comparison of sensing platforms for the detection of biothiols.

| Materials                                                       | Methods                     | Linear range<br>( $\mu\text{mol}\cdot\text{L}^{-1}$ ) | LOD<br>( $\mu\text{mol}\cdot\text{L}^{-1}$ ) | Response<br>time (min) | Ref. |
|-----------------------------------------------------------------|-----------------------------|-------------------------------------------------------|----------------------------------------------|------------------------|------|
| Organic molecular<br>(Rhodamine B)                              | Fluorometry                 | 0-12                                                  | GSH: 5.15                                    | 20 min                 | 1    |
|                                                                 |                             | 0-12                                                  | Cys: 0.865                                   |                        |      |
|                                                                 |                             | 0-12                                                  | Hcy: 6.51                                    |                        |      |
| Organic molecular<br>(fluorescent dye JSC)                      | Fluorometry                 | 0-8                                                   | GSH: 0.0042                                  | -                      | 2    |
|                                                                 |                             | 0-5                                                   | Cys: 0.0079                                  |                        |      |
|                                                                 |                             | 0-30                                                  | Hcy: 0.0102                                  |                        |      |
| Organic molecular<br>(xanthene derivative)                      | Fluorometry                 | 0-4                                                   | GSH: 0.0095                                  | -                      | 3    |
|                                                                 |                             | 0.5-4.5                                               | Cys: 0.0048                                  |                        |      |
|                                                                 |                             | 0-1.5                                                 | Hcy: 0.0062                                  |                        |      |
| Organic molecular<br>(quinoxaline)                              | Fluorometry                 | 1-7                                                   | GSH: 0.0571                                  | 180 min                | 4    |
|                                                                 |                             | 1-8                                                   | Cys: 0.0366                                  | 30 min                 |      |
|                                                                 |                             | 1-10                                                  | Hcy: 0.1165                                  | 180 min                |      |
| AuNCs@ZIF-8                                                     | Fluorometry                 | 1.5-8                                                 | GSH: 0.32                                    | 10 min                 | 5    |
|                                                                 |                             | 1-10                                                  | Cys: 0.15                                    |                        |      |
| poly(thymine)-<br>templated copper<br>nanoparticles             | Fluorometry                 | 0-10                                                  | GSH: 0.015                                   | 10 min                 | 6    |
|                                                                 |                             | 0-10                                                  | Cys: 0.0125                                  |                        |      |
|                                                                 |                             | 0-10                                                  | Hcy: 0.02                                    |                        |      |
| DNA-templated silver<br>nanoclusters-Hg <sup>2+</sup><br>system | Fluorometry                 | 0.04-0.1                                              | GSH:<br>0.00288                              | -                      | 7    |
|                                                                 |                             | 0.02-0.1                                              | Cys: 0.00159                                 |                        |      |
|                                                                 |                             |                                                       |                                              |                        |      |
| Nanocluster of copper<br>and silver                             | Fluorometry<br>/colorimetry | 20-80                                                 | Cys: 7.0                                     | -                      | 8    |
|                                                                 |                             | 20-520                                                | GSH:                                         |                        |      |
| Carbon dot                                                      | Fluorometry                 | 5-580                                                 | 0.02039                                      | -                      | 9    |
|                                                                 |                             | Hcy:80-360                                            | Cys: 0.00931                                 |                        |      |

---

|                   |             |        |              |        |           |
|-------------------|-------------|--------|--------------|--------|-----------|
|                   |             |        | Hcy: 0.00193 |        |           |
|                   |             | 5-200  | GSH: 1.7     |        |           |
| Carbon dots       | Fluorometry | 5-100  | Cys: 2.3     | -      | 10        |
|                   |             | 5-225  | Hcy: 3.0     |        |           |
| Organic molecular |             | 0.1-50 | GSH: 0.0074  |        |           |
| (spiropyran)      | Fluorometry | 0.1-50 | Cys: 0.0086  | < 1min | This work |
|                   |             | 0.1-50 | Hcy: 0.0082  |        |           |

---



### 3. IR, NMR and MS spectra.

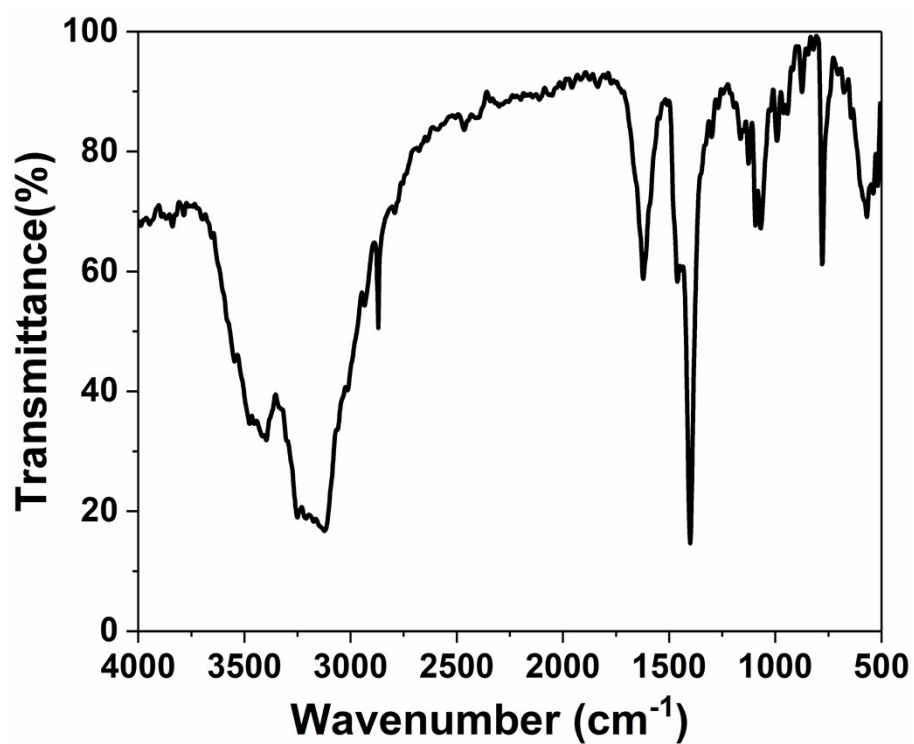

Fig. S21 IR spectrum of compound 1 in KBr.

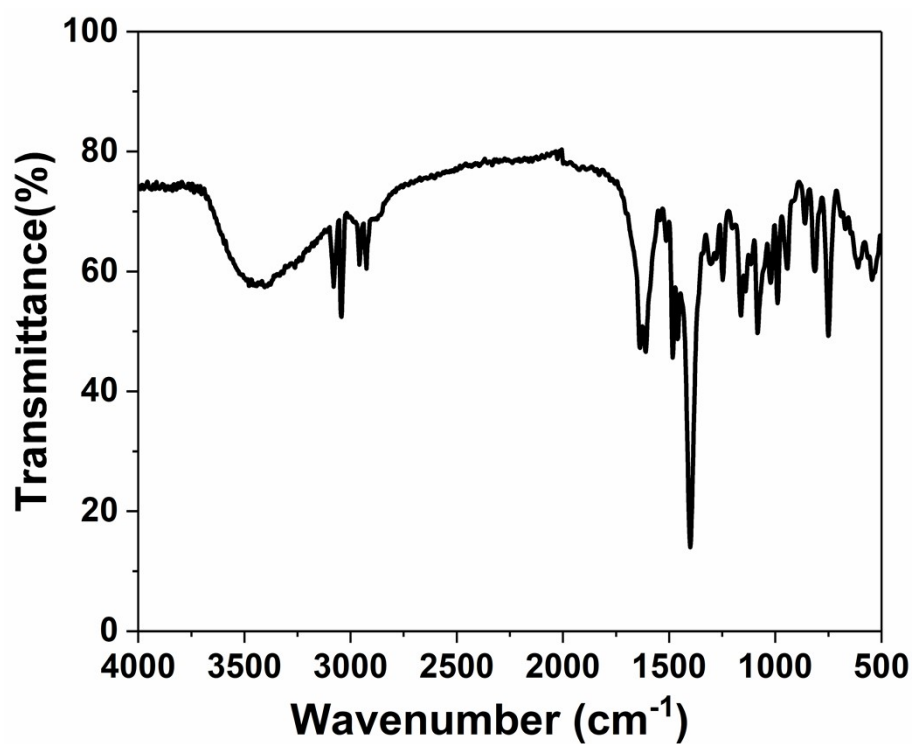

Fig. S22 IR spectrum of compound 2 in KBr.

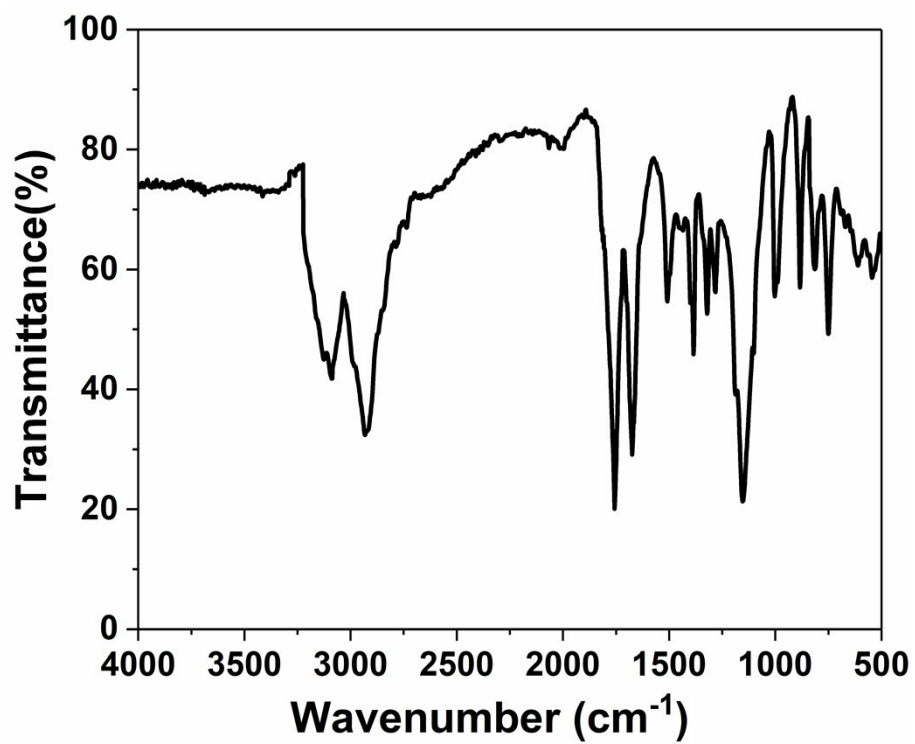

Fig. S23 IR spectrum of probe *SPI* in KBr.

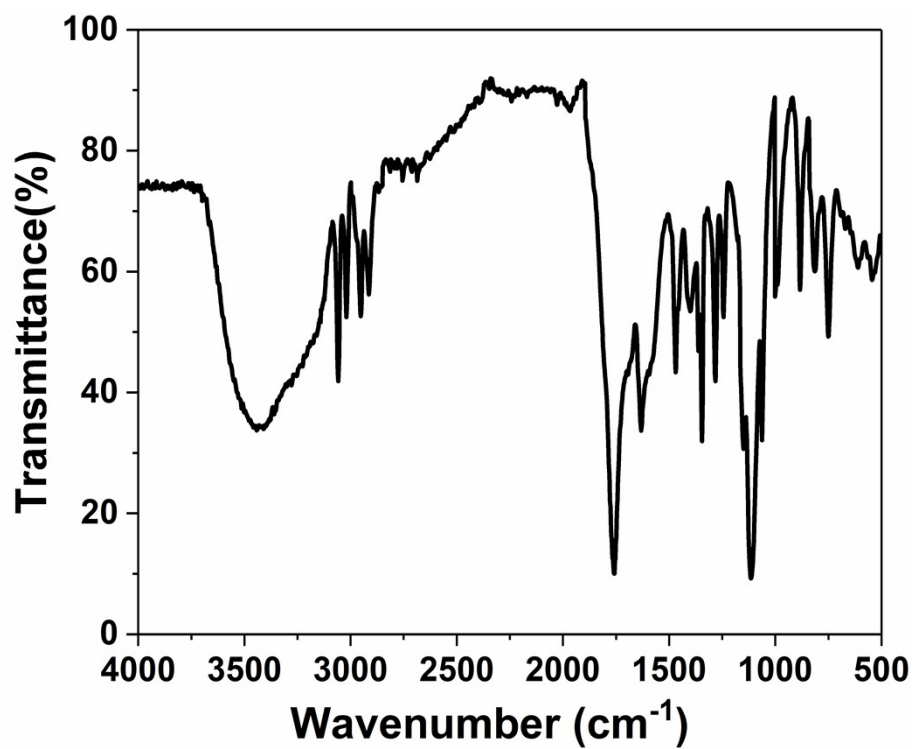

Fig. S24 IR spectrum of probe *SPI* + Cys in KBr.

**Acquisition Parameter**

|             |            |                       |           |                  |           |
|-------------|------------|-----------------------|-----------|------------------|-----------|
| Source Type | ESI        | Ion Polarity          | Positive  | Set Nebulizer    | 0.3 Bar   |
| Focus       | Not active | Set Capillary         | 4500 V    | Set Dry Heater   | 180 °C    |
| Scan Begin  | 50 m/z     | Set End Plate Offset  | -500 V    | Set Dry Gas      | 4.0 l/min |
| Scan End    | 3000 m/z   | Set Collision Cell RF | 110.0 Vpp | Set Divert Valve | Source    |

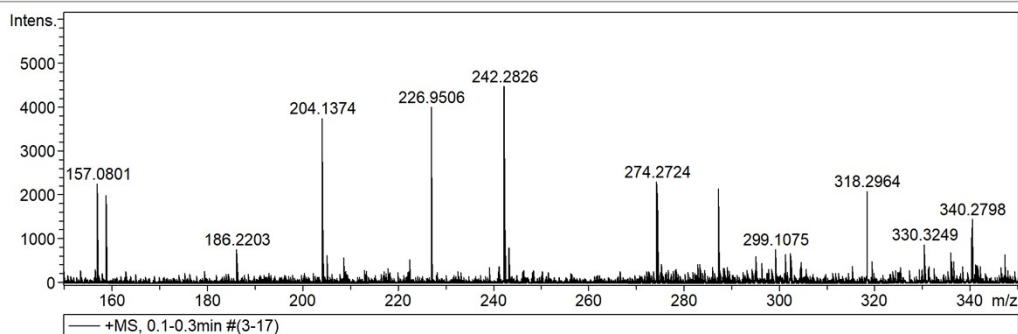**Fig. S25** Mass spectrum of compound 1.**Acquisition Parameter**

|             |            |                       |           |                  |           |
|-------------|------------|-----------------------|-----------|------------------|-----------|
| Source Type | ESI        | Ion Polarity          | Positive  | Set Nebulizer    | 0.4 Bar   |
| Focus       | Not active | Set Capillary         | 4500 V    | Set Dry Heater   | 180 °C    |
| Scan Begin  | 50 m/z     | Set End Plate Offset  | -500 V    | Set Dry Gas      | 4.0 l/min |
| Scan End    | 3000 m/z   | Set Collision Cell RF | 110.0 Vpp | Set Divert Valve | Source    |

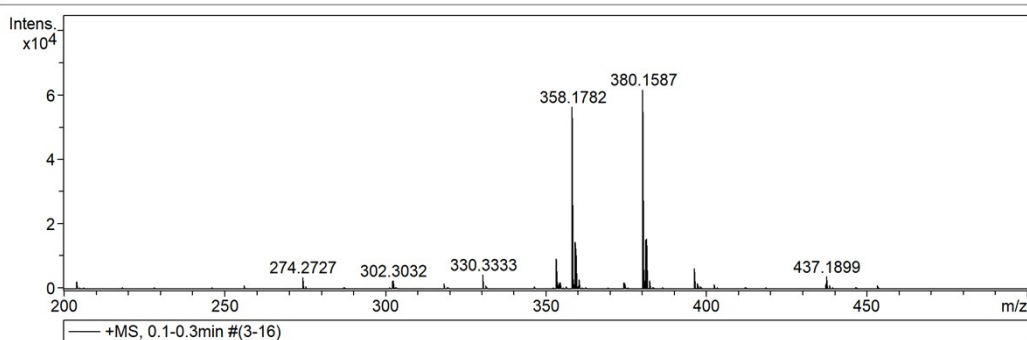**Fig. S26** Mass spectrum of compound 2.

**Acquisition Parameter**

|             |            |                       |           |                  |           |
|-------------|------------|-----------------------|-----------|------------------|-----------|
| Source Type | ESI        | Ion Polarity          | Positive  | Set Nebulizer    | 0.3 Bar   |
| Focus       | Not active | Set Capillary         | 4500 V    | Set Dry Heater   | 180 °C    |
| Scan Begin  | 50 m/z     | Set End Plate Offset  | -500 V    | Set Dry Gas      | 4.0 l/min |
| Scan End    | 3000 m/z   | Set Collision Cell RF | 110.0 Vpp | Set Divert Valve | Source    |

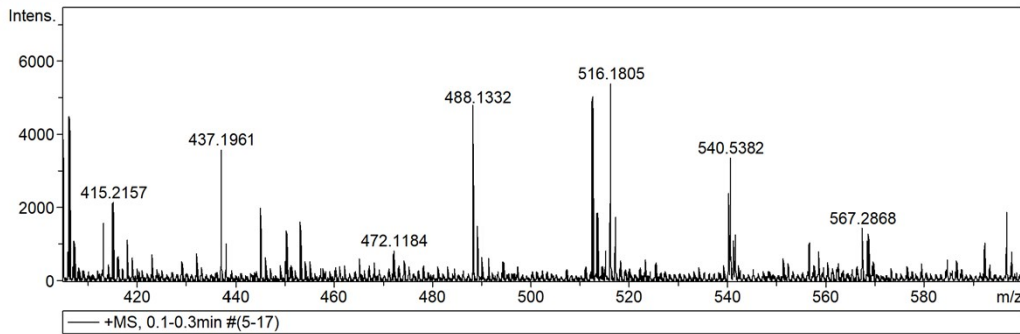

**Fig. S27** Mass spectrum of probe *SPI*.

**Acquisition Parameter**

|             |          |                       |           |                  |           |
|-------------|----------|-----------------------|-----------|------------------|-----------|
| Source Type | ESI      | Ion Polarity          | Positive  | Set Nebulizer    | 0.3 Bar   |
| Focus       | Active   | Set Capillary         | 4500 V    | Set Dry Heater   | 180 °C    |
| Scan Begin  | 300 m/z  | Set End Plate Offset  | -500 V    | Set Dry Gas      | 4.0 l/min |
| Scan End    | 3000 m/z | Set Collision Cell RF | 800.0 Vpp | Set Divert Valve | Source    |

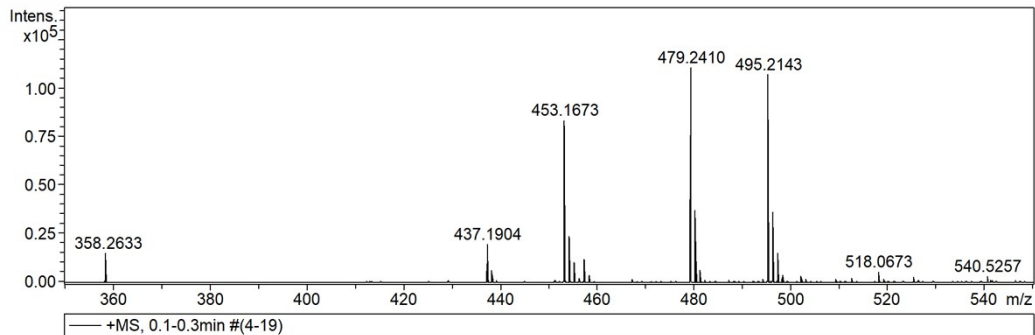

**Fig. S28** Mass spectrum of probe *SPI* + Cys.

**Acquisition Parameter**

|             |            |                       |           |                  |           |
|-------------|------------|-----------------------|-----------|------------------|-----------|
| Source Type | ESI        | Ion Polarity          | Positive  | Set Nebulizer    | 0.4 Bar   |
| Focus       | Not active | Set Capillary         | 4500 V    | Set Dry Heater   | 180 °C    |
| Scan Begin  | 50 m/z     | Set End Plate Offset  | -500 V    | Set Dry Gas      | 4.0 l/min |
| Scan End    | 3000 m/z   | Set Collision Cell RF | 110.0 Vpp | Set Divert Valve | Source    |

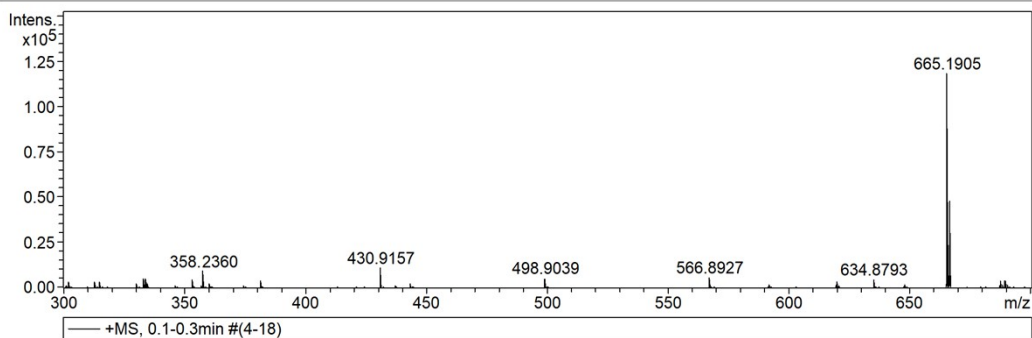

**Fig. S29** Mass spectrum of probe *SPI* + GSH.

**Acquisition Parameter**

|             |            |                       |           |                  |           |
|-------------|------------|-----------------------|-----------|------------------|-----------|
| Source Type | ESI        | Ion Polarity          | Positive  | Set Nebulizer    | 0.4 Bar   |
| Focus       | Not active | Set Capillary         | 4500 V    | Set Dry Heater   | 180 °C    |
| Scan Begin  | 50 m/z     | Set End Plate Offset  | -500 V    | Set Dry Gas      | 4.0 l/min |
| Scan End    | 3000 m/z   | Set Collision Cell RF | 110.0 Vpp | Set Divert Valve | Source    |

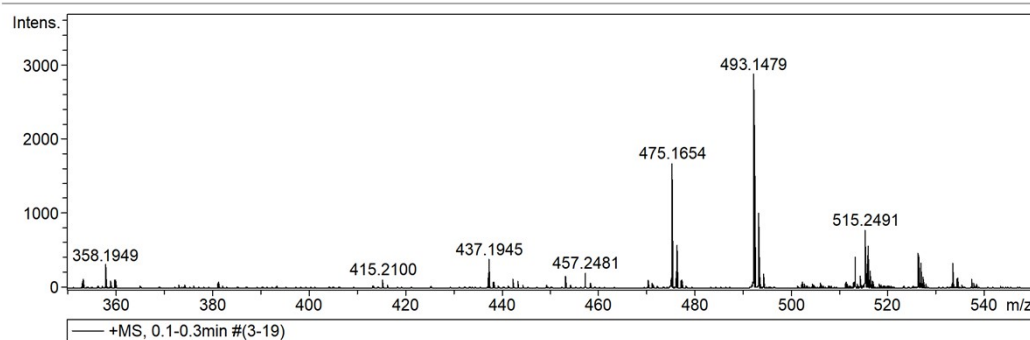

**Fig. S30** Mass spectrum of probe *SPI* + Hcy.

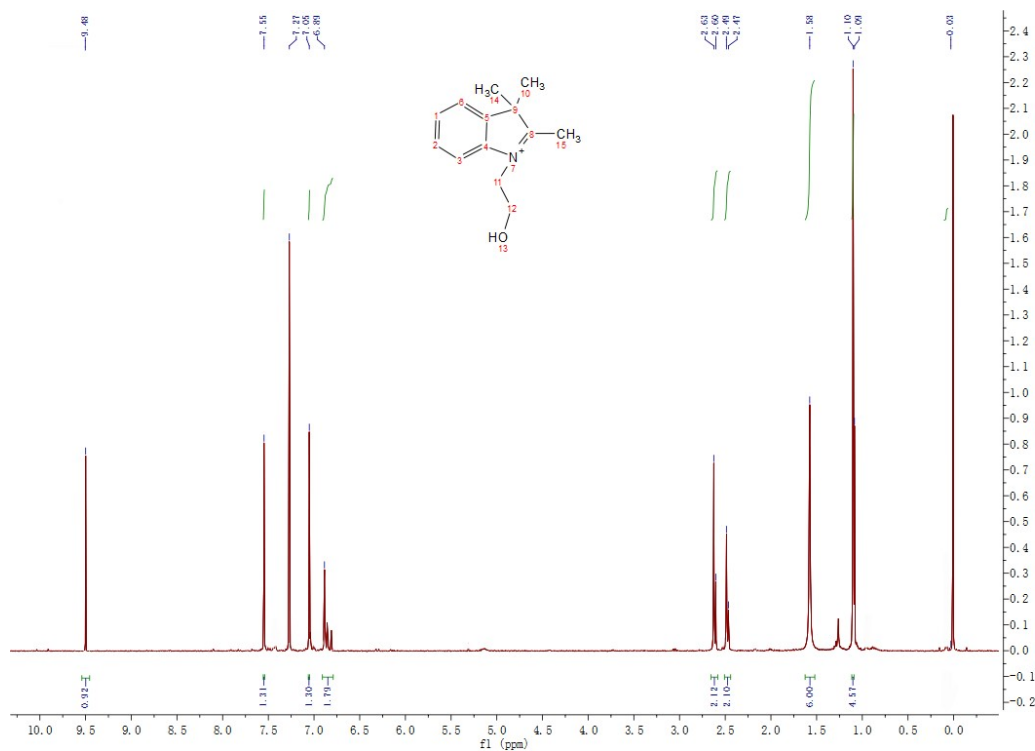

**Fig. S31**  $^1\text{H}$  NMR spectrum of compound **1** in  $\text{CDCl}_3$ .

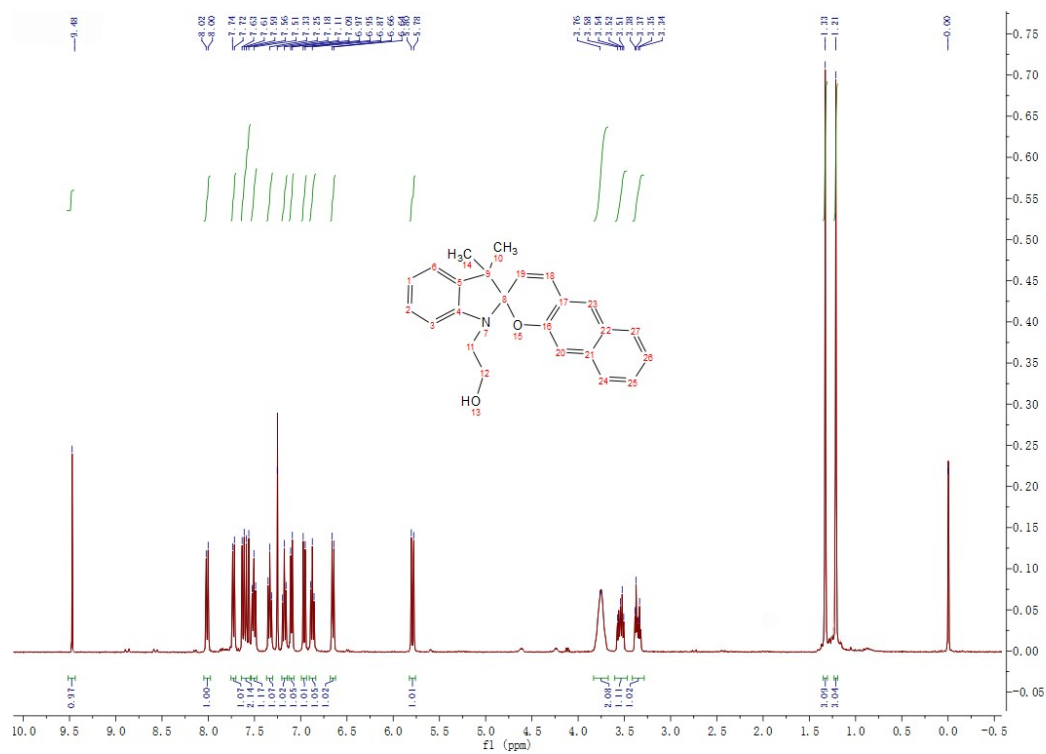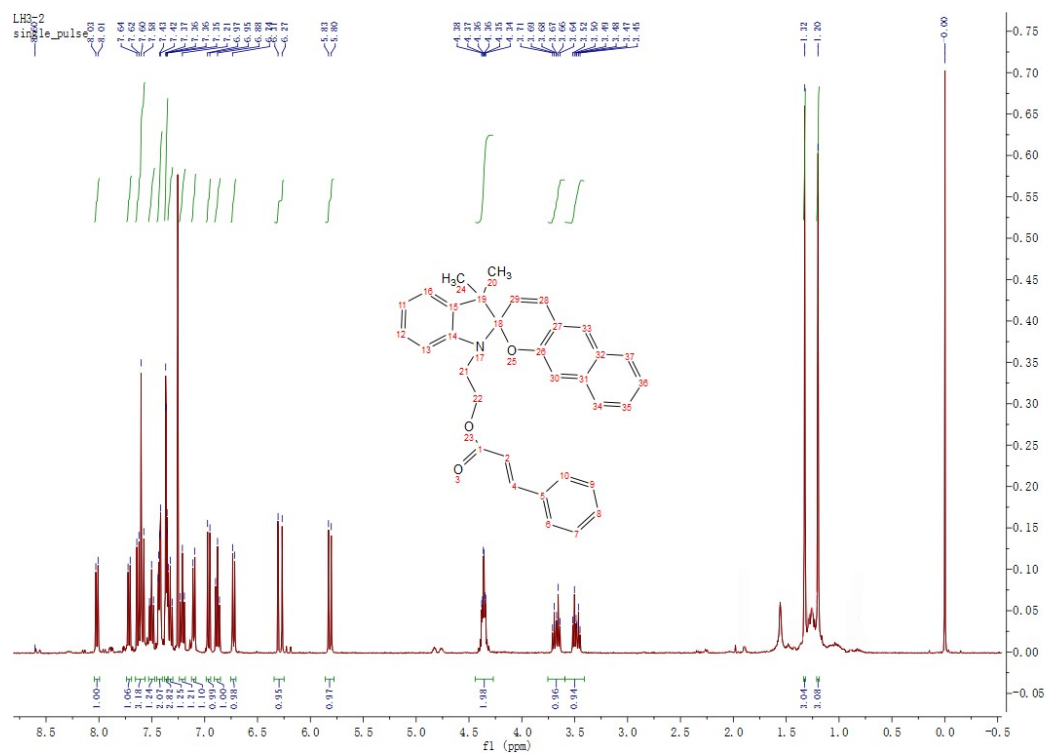

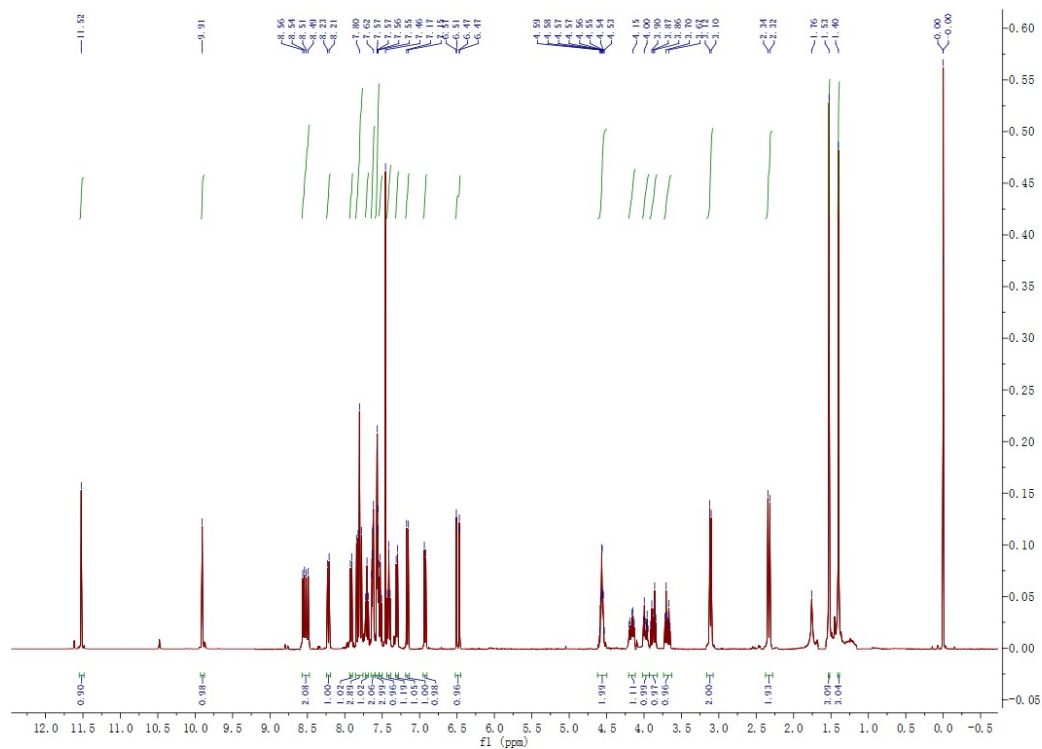

Fig. S34  $^1\text{H}$  NMR spectrum of probe *SP1* + Cys in  $\text{CDCl}_3$ .

#### 4. MTT assay results of the probe.

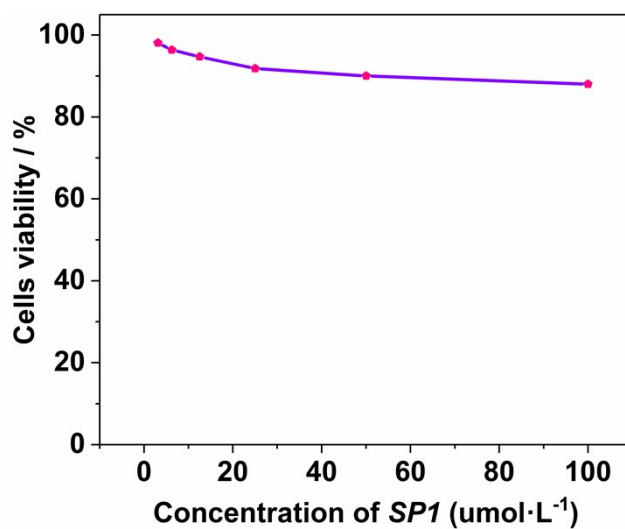

Fig. S35. The influence of cell viability with the change of *SP1* concentration.

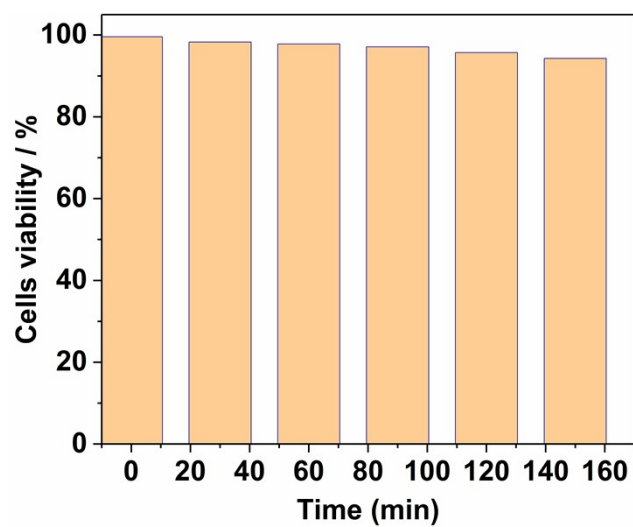

**Fig. S36.** The relationship between cell viability and incubation time.

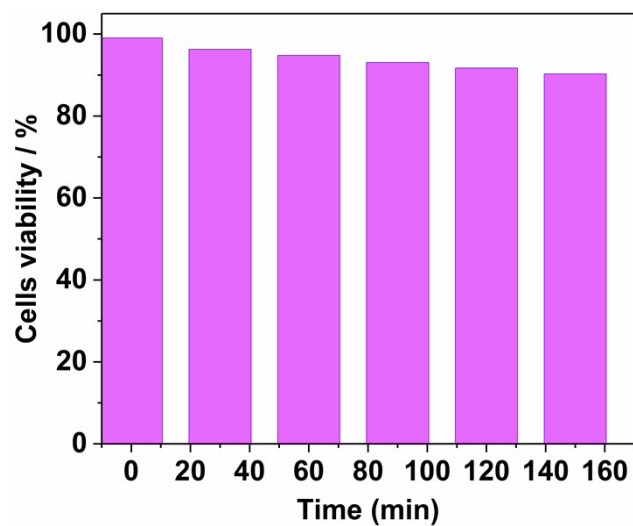

**Fig. S37.** The relationship between cell viability and incubation time in addition of  $20 \mu\text{mol}\cdot\text{L}^{-1}$  of *SPI*.



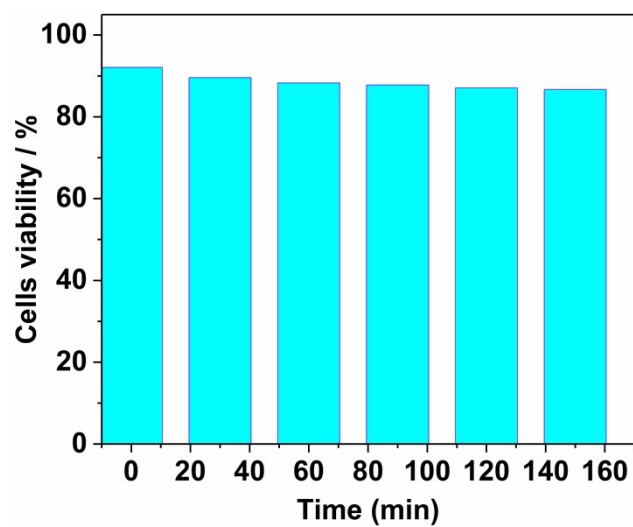

**Fig. S38.** The relationship between cell viability and incubation time in addition of 20  $\mu\text{mol}\cdot\text{L}^{-1}$  of *SPI* and 2.5 equiv. of Cys.

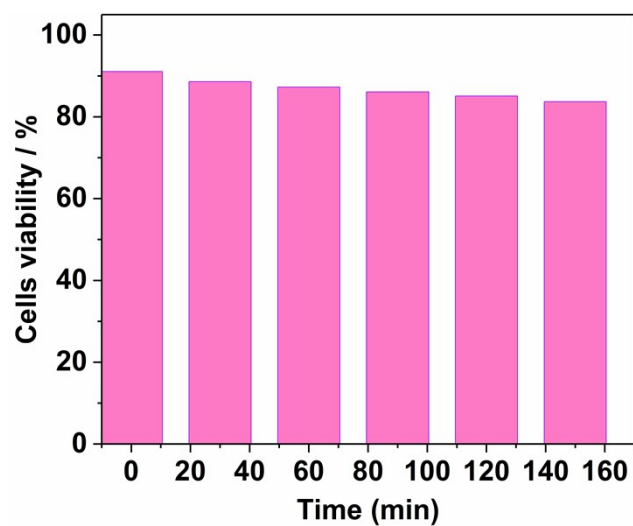

**Fig. S39.** The relationship between cell viability and incubation time in addition of 20  $\mu\text{mol}\cdot\text{L}^{-1}$  of *SPI* and 2.5 equiv. of GSH.

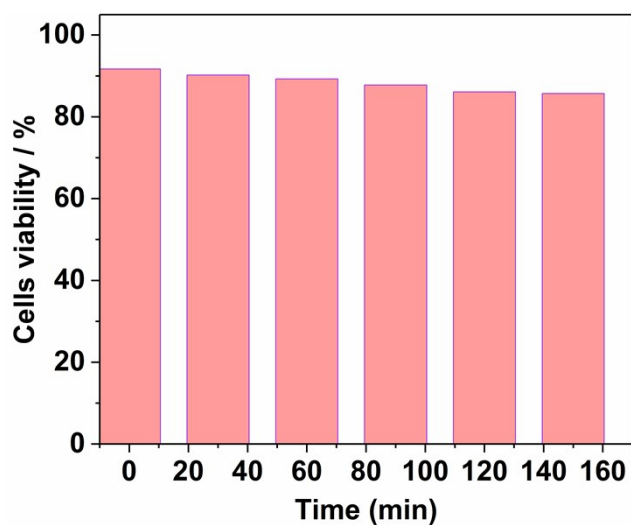

**Fig. S40.** The relationship between cell viability and incubation time in addition of 20  $\mu\text{mol}\cdot\text{L}^{-1}$  of *SPI* and 2.5 equiv. of Hcy.

**Table S5.** MTT assay results, calculated inhibition ratio and  $\text{IC}_{50}$  value of the probe *SPI* for MG-63 cell.

| [ <i>SPI</i> ]/ $\mu\text{M}$ | 1     | 2     | 3     | Average | Inhibition ratio | $\text{IC}_{50}/\mu\text{M}$ |
|-------------------------------|-------|-------|-------|---------|------------------|------------------------------|
| 3.125                         | 0.443 | 0.463 | 0.455 | 0.4537  | 0.0188           |                              |
| 6.25                          | 0.448 | 0.455 | 0.434 | 0.4457  | 0.0361           |                              |
| 12.5                          | 0.432 | 0.434 | 0.448 | 0.4380  | 0.0527           |                              |
| 25                            | 0.416 | 0.426 | 0.432 | 0.4247  | 0.0816           | >100                         |
| 50                            | 0.412 | 0.414 | 0.423 | 0.4163  | 0.0996           |                              |
| 100                           | 0.372 | 0.387 | 0.362 | 0.3737  | 0.1919           |                              |
